# Supplementary material
Source: PubMed Central journal article supplement (PMC1450238)
Supplement: pnas_0505663103_6.pdf [file pnas_0505663103_6.pdf]

Table 1. The effect of RM-A on cell viability in various cell lines

| Cell             | Lineage                       | Cell viability,<br>IC <sub>50</sub> , $\mu$ M |
|------------------|-------------------------------|-----------------------------------------------|
| THP-1            | Human monoblast               | 21.3                                          |
| U937             | Human monoblast               | 17.6                                          |
| HL60             | Human promyeloblast           | 21.2                                          |
| K562             | Human myeloblast              | 19.7                                          |
| K549             | Human lung carcinoma          | >100                                          |
| Hela             | Human cervical carcinoma      | 78.0                                          |
| MCF-7            | Human adenocarcinoma          | >100                                          |
| Jurkat           | Human T cell lymphoma         | 52.5                                          |
| Raji             | Human B cell lymphoma         | 23.6                                          |
| KYM-1            | Human rhabdomyosarcoma        | 53.2                                          |
| RAW 264          | Mouse monocyte                | 38.1                                          |
| NIH3T3           | Mouse fibroblast              | >100                                          |
| EL4              | Mouse T cell lymphoma         | 64.5                                          |
| BaF3             | Mouse B cell lymphoma         | 76.0                                          |
| NRK              | Rat kidney cell               | 74.9                                          |
| Bone marrow cell | Purified from mouse bone      | >30                                           |
| Osteoblast       | Purified from mouse calvariae | >30                                           |
| Osteoclast       | Purified from coculture       | 0.21                                          |

**Table 1 Woo et al.**
