# Supplementary material
Source: PubMed Central journal article supplement (PMC1450238)
Supplement: pnas_0505663103_7.pdf [file pnas_0505663103_7.pdf]

**Table 2. Pharmacokinetic profiles of RM-A in Sprague–Dawley rats**

| Route | Dose, mg/kg | AUC, nM × h | $F^*$              | $t_{1/2}$ , h |
|-------|-------------|-------------|--------------------|---------------|
| i.v.  | 20          | 23,287      | 1.000              | 0.88          |
| p.o.  | 50          | 257.9       | 0.011 <sup>†</sup> | -             |
| i.p.  | 20          | 9,537       | 0.410              | 0.93          |
| s.c.  | 20          | 14,645      | 0.629              | 1.35          |

\* $F = \text{AUC (Route)} / \text{AUC (IV)}$

<sup>†</sup>Normalized for dose.

AUC, area under the curve.
