# Supplementary material
Source: PubMed Central journal article supplement (PMC1450238)

**Acridine  
orange**

**TRAP**

**Nuclei**

**CON**

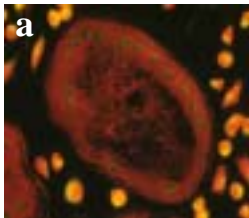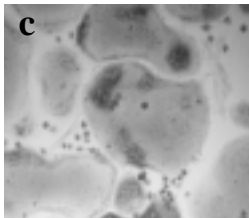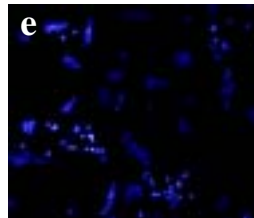

**CM-A  
+ RM-A**

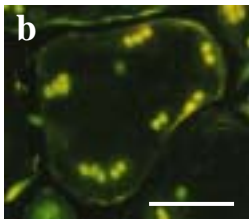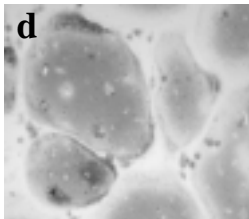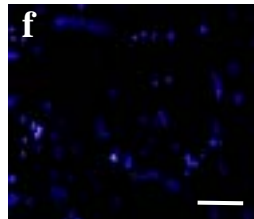

Supplement: pnas_0505663103_2.pdf [file pnas_0505663103_2.pdf]

**A**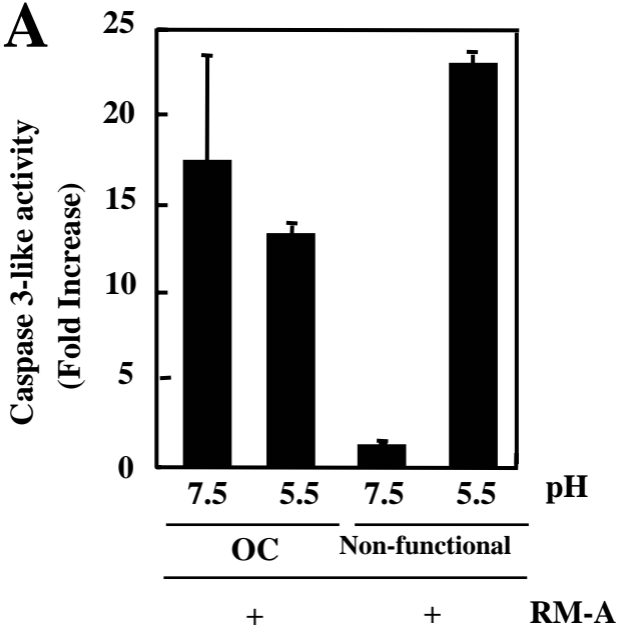**B**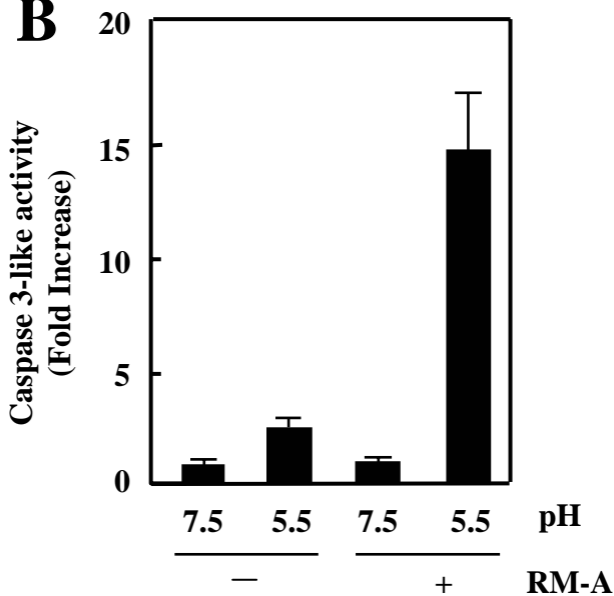

Supplement: pnas_0505663103_3.pdf [file pnas_0505663103_3.pdf]

**A**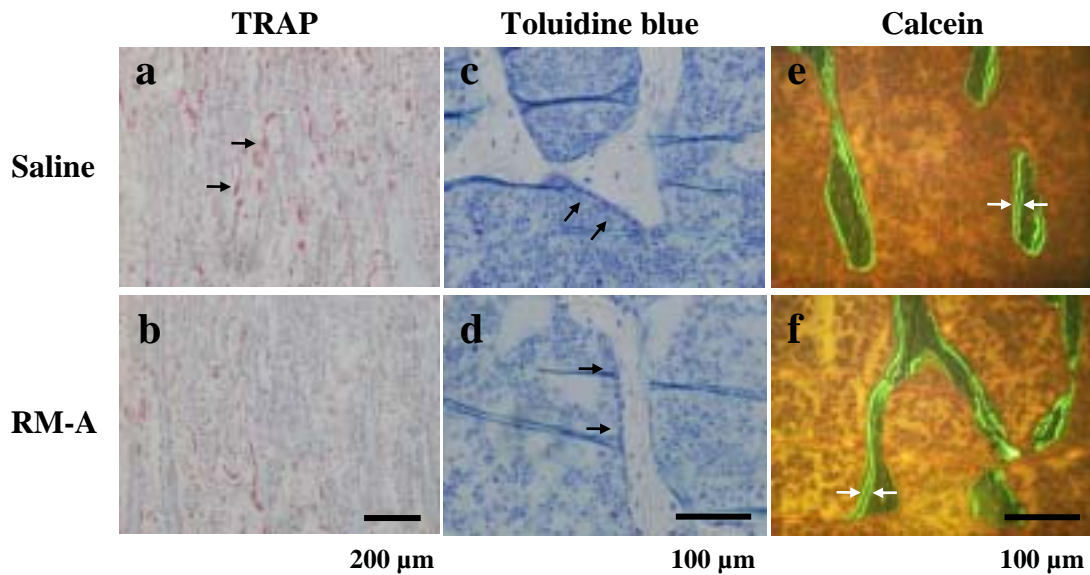**B**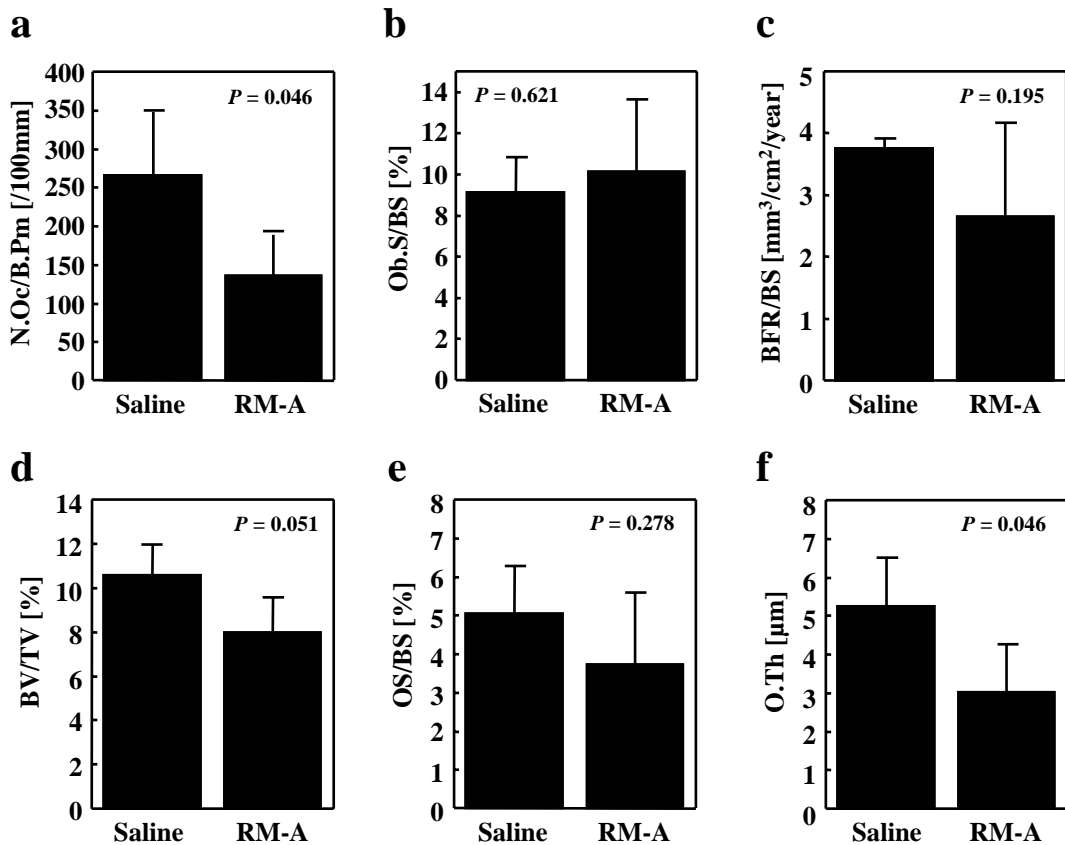

Supplement: pnas_0505663103_4.pdf [file pnas_0505663103_4.pdf]

**A**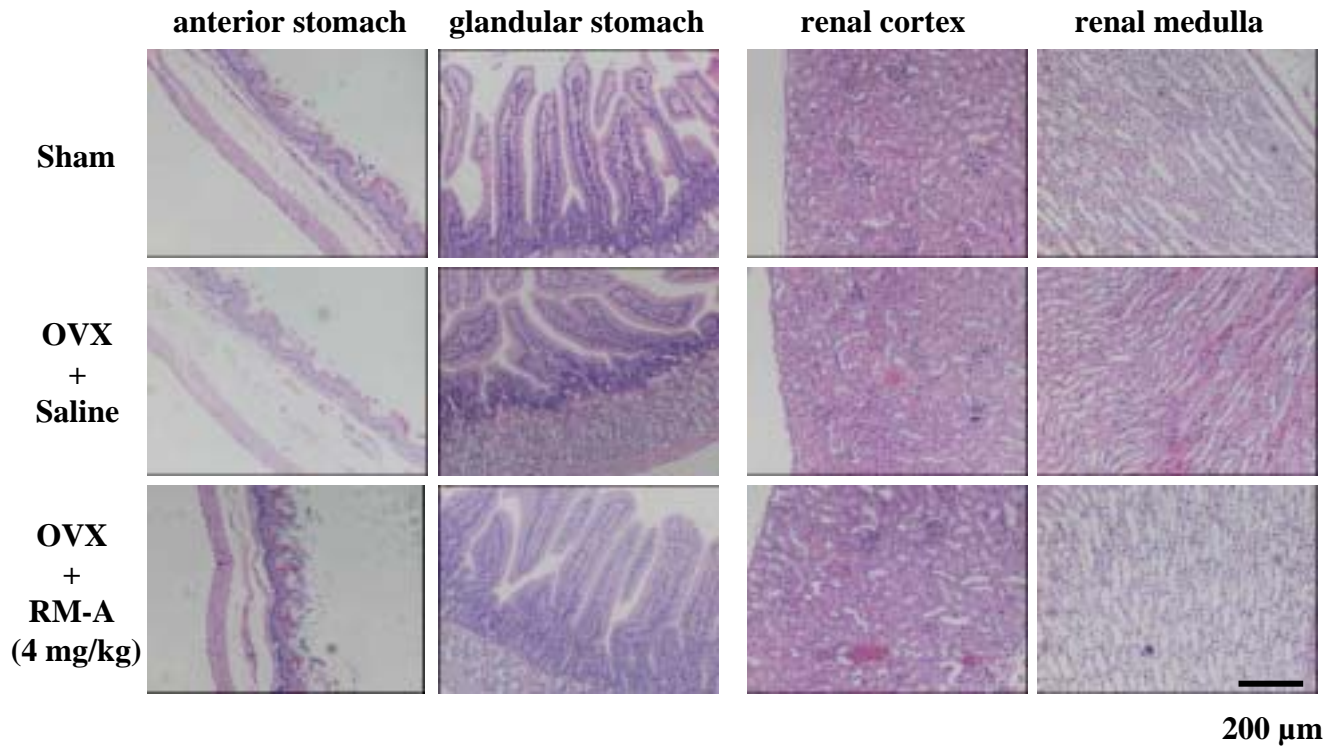**B**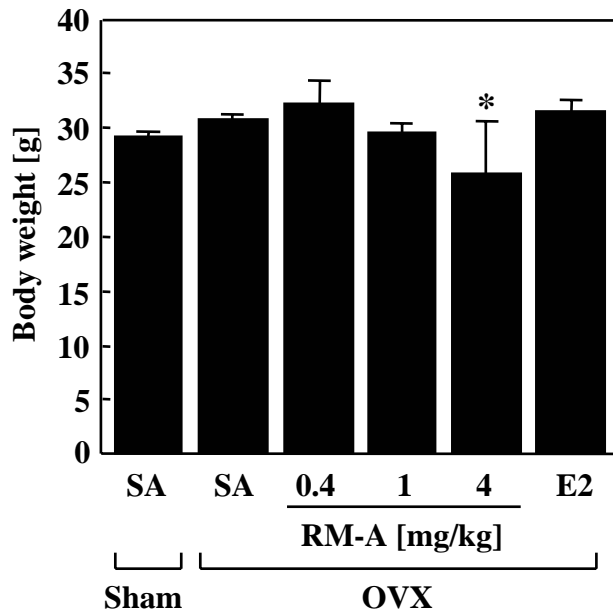**C**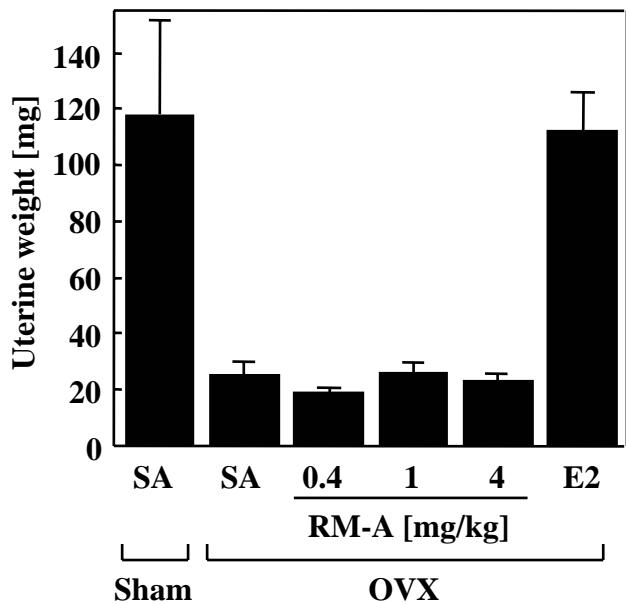

Supplement: pnas_0505663103_5.pdf [file pnas_0505663103_5.pdf]
